# Supplementary material for: Ammonia storage performance of thiocyanate-based pseudo ionic liquids: experimental study and computational chemistry analysis
Source: Royal Society of Chemistry journal article supplement (doi:10.1039/d4se00659c), 2024-01-01
Supplement: d4se00659c1.pdf [file d4se00659c1.pdf]

## Supporting Information

### **Ammonia Storage Performance of Thiocyanate-Based Pseudo Ionic Liquids: Experimental Study and Computational Chemistry Analysis**

Yu Cao, Kejie Jiang, Dongshun Deng\*

*Zhejiang Province Key Laboratory of Biofuel, College of Chemical Engineering,  
Zhejiang University of Technology, Hangzhou 310014, China.*

**\*Corresponding author:**

Address: Zhejiang Province Key Laboratory of Biofuel, College of Chemical  
Engineering, Zhejiang University of Technology, Hangzhou 310014, China.

Email: [dengdsh@zjut.edu.cn](mailto:dengdsh@zjut.edu.cn)

### Classical molecular dynamics (CMD) simulation details

The ratio of NH<sub>3</sub> to PILs in simulation box should correspond to actual NH<sub>3</sub> absorption capacity of each PIL, with the distribution of molecular quantities in each box as follows:

| PILs                                                    | [PIL] <sup>+</sup> | [SCN] <sup>-</sup> | NH <sub>3</sub> |
|---------------------------------------------------------|--------------------|--------------------|-----------------|
| [Im][SCN]                                               | 320                | 320                | 960             |
| NH <sub>4</sub> SCN                                     | 400                | 400                | 800             |
| [CH <sub>3</sub> NH <sub>3</sub> ][SCN]                 | 400                | 400                | 800             |
| [CH <sub>3</sub> CH <sub>2</sub> NH <sub>3</sub> ][SCN] | 400                | 400                | 800             |
| [1,2,3-TriZ][SCN] <sub>2</sub>                          | 280                | 560                | 840             |

Throughout all simulation processes, the same method was employed to handle non-bonded interactions: atom neighbor list was updated using the Verlet strategy to save computational time, long-range Coulomb interactions were calculated using the Particle Mesh Ewald (PME) method, and van der Waals forces were addressed with simple cutoff strategy. The cutoff distance for all three was set to 1.0 nm, consistent with original OPLS-AA force field documentation. Additionally, energy and pressure (EnerPres) corrections were used to account for long-range dispersion effects in systems.

Energy minimization was performed using conjugate gradient (cg) algorithm, with step size of 0.001 nm. Until system energy converged to 100 kJ/mol, the algorithm was terminated and structure with unreasonable contacts removed was output. Temperature and pressure control steps kept the internal temperature and pressure of the box at 298.15 K and 0.1 mPa, respectively, using the V-rescale temperature bath and the Berendsen pressure bath, lasting for 500 ps to allow system to equilibrate adequately. During equilibration simulation phase, pressure controlling method was switched to Parrinello-Rahman, continuing with NPT ensemble. The step size was set to 0.001 ps, with total simulation duration of 10 ns, outputting coordinates and energy information every 1000 steps. The 10,000 frames of atomic data produced during equilibrium simulation were used for subsequent analysis.

### **Ab initio molecular dynamics (AIMD) simulation details**

A box with dimensions of  $8 \times 8 \times 8 \text{ nm}^3$  was constructed using Packmol, containing 4  $[\text{NH}_4]^+$ , 4  $[\text{SCN}]^-$ , and 8  $\text{NH}_3$  molecules. Energy minimization was performed using GROMACS 2019.6 with OPLS-AA force field, setting Coulomb and van der Waals cutoff radii to 0.2 nm to eliminate unreasonable contacts within the box. The optimized structure from this process served as initial structure for AIMD calculations. AIMD simulations were performed with time step of 1.0 fs for a total of 10000 steps, with structure files output at each step. Three-dimensional periodic boundary conditions were applied to account for interactions between atoms in the box and surrounding. To save computational time, only  $\gamma$  point was considered during calculations. Atomic-centered basis set DZVP-MOLOPT-SR-GTH and plane-wave cutoff energy of 400 Ry were used to describe valence electrons, while GTH-BLYP pseudopotentials optimized for BLYP functional described core electrons. Density gradient approximation functional BLYP was used for electron distribution and system energy in self-consistent field (SCF) calculations. To improve efficiency, the convergence criterion for density matrix in SCF iterations was relaxed from  $1 \times 10^{-5}$  to  $5 \times 10^{-5}$ . Throughout the simulation, no SCF convergence failures occurred, and each frame of the structure files was carefully examined to ensure reasonable results.

**Table S1** Detailed absorption data of PILs under ammonia at 0.1 MPa.

(a) for [Im][SCN]

| Time (min) | Ammonia capacity (g NH <sub>3</sub> /g PIL) |          |          |          |
|------------|---------------------------------------------|----------|----------|----------|
|            | 293.15 K                                    | 303.15 K | 313.15 K | 323.15 K |
| 0          | 0                                           | 0        | 0        | 0        |
| 2          | 0.0509                                      | 0.05025  | 0.05352  | 0.04516  |
| 4          | 0.09714                                     | 0.0897   | 0.10264  | 0.09467  |
| 6          | 0.14774                                     | 0.13183  | 0.15456  | 0.14001  |
| 8          | 0.20211                                     | 0.17387  | 0.20094  | 0.18697  |
| 10         | 0.25397                                     | 0.22028  | 0.24527  | 0.22813  |
| 15         | 0.35953                                     | 0.30174  | 0.30255  | 0.26475  |
| 20         | 0.41922                                     | 0.34804  | 0.31213  | 0.27003  |
| 25         | 0.43561                                     | 0.36475  | 0.31291  | 0.27077  |
| 30         | 0.43931                                     | 0.36898  | 0.31352  | 0.27056  |
| 35         | 0.44051                                     | 0.3701   | 0.31355  | 0.27056  |
| 40         | 0.44268                                     | 0.37084  | 0.31345  |          |
| 45         | 0.4423                                      | 0.37065  |          |          |
| 50         | 0.44214                                     | 0.37078  |          |          |

(b)for [NH<sub>4</sub>][SCN]

| Time (min) | Ammonia capacity (g NH <sub>3</sub> /g PIL) |          |          |          |
|------------|---------------------------------------------|----------|----------|----------|
|            | 293.15 K                                    | 303.15 K | 313.15 K | 323.15 K |
| 0          | 0                                           | 0        | 0        | 0        |
| 2          | 0.03943                                     | 0.0366   | 0.02436  | 0.02235  |
| 4          | 0.08795                                     | 0.07687  | 0.06263  | 0.06146  |
| 6          | 0.13571                                     | 0.11491  | 0.09921  | 0.0943   |
| 8          | 0.17929                                     | 0.14937  | 0.13085  | 0.12243  |
| 10         | 0.22646                                     | 0.19277  | 0.16409  | 0.15315  |
| 15         | 0.33762                                     | 0.27253  | 0.24683  | 0.21991  |
| 20         | 0.42662                                     | 0.33997  | 0.29577  | 0.24321  |
| 25         | 0.47447                                     | 0.37274  | 0.31326  | 0.24857  |
| 30         | 0.49265                                     | 0.38833  | 0.31896  | 0.25042  |
| 35         | 0.49977                                     | 0.39595  | 0.32045  | 0.25036  |
| 40         | 0.50216                                     | 0.39807  | 0.32179  | 0.25042  |
| 45         | 0.5033                                      | 0.39939  | 0.32189  | 0.25034  |
| 50         | 0.50378                                     | 0.40019  | 0.32184  |          |
| 55         | 0.50429                                     | 0.40081  | 0.32173  |          |
| 60         | 0.50433                                     | 0.40153  |          |          |
| 70         | 0.50443                                     | 0.4017   |          |          |
| 80         | 0.50437                                     | 0.4019   |          |          |
| 90         | 0.50427                                     | 0.40205  |          |          |
| 100        |                                             | 0.40197  |          |          |

(c) for [CH<sub>3</sub>NH<sub>3</sub>][SCN]

| Time (min) | Ammonia capacity (g NH <sub>3</sub> /g PIL) |          |          |          |
|------------|---------------------------------------------|----------|----------|----------|
|            | 293.15 K                                    | 303.15 K | 313.15 K | 323.15 K |
| 0          | 0                                           | 0        | 0        | 0        |
| 2          | 0.05055                                     | 0.04383  | 0.04554  | 0.04483  |
| 4          | 0.10999                                     | 0.09458  | 0.09086  | 0.09173  |
| 6          | 0.16976                                     | 0.15563  | 0.13546  | 0.13054  |
| 8          | 0.22224                                     | 0.2052   | 0.16785  | 0.15618  |
| 10         | 0.26595                                     | 0.24052  | 0.19349  | 0.16995  |
| 15         | 0.33155                                     | 0.27478  | 0.22015  | 0.17771  |
| 20         | 0.35071                                     | 0.27826  | 0.22283  | 0.17763  |
| 25         | 0.35621                                     | 0.27556  | 0.22251  | 0.17761  |
| 30         | 0.35607                                     | 0.27641  | 0.22251  |          |
| 35         | 0.35436                                     |          |          |          |

(d) for [CH<sub>3</sub>CH<sub>2</sub>NH<sub>3</sub>][SCN]

| Time (min) | Ammonia capacity (g NH <sub>3</sub> /g PIL) |          |          |          |
|------------|---------------------------------------------|----------|----------|----------|
|            | 293.15 K                                    | 303.15 K | 313.15 K | 323.15 K |
| 0          | 0                                           | 0        | 0        | 0        |
| 2          | 0.0329                                      | 0.04396  | 0.04572  | 0.03549  |
| 4          | 0.07053                                     | 0.08573  | 0.09347  | 0.07167  |
| 6          | 0.10739                                     | 0.13858  | 0.13555  | 0.10171  |
| 8          | 0.14531                                     | 0.16759  | 0.16325  | 0.12551  |
| 10         | 0.1797                                      | 0.19745  | 0.17738  | 0.13971  |
| 15         | 0.24351                                     | 0.22456  | 0.18313  | 0.14453  |
| 20         | 0.27904                                     | 0.23164  | 0.1828   | 0.14503  |
| 25         | 0.29039                                     | 0.23178  | 0.18208  | 0.14324  |
| 30         | 0.29046                                     | 0.23108  |          |          |
| 35         | 0.29037                                     |          |          |          |

(e) for [1,2,4-TriZ][SCN]<sub>2</sub>

| Time (min) | Ammonia capacity (g NH <sub>3</sub> /g PIL) |          |          |          |
|------------|---------------------------------------------|----------|----------|----------|
|            | 293.15 K                                    | 303.15 K | 313.15 K | 323.15 K |
| 0          | 0                                           | 0        | 0        | 0        |
| 2          | 0.01051                                     | 0.00719  | 7.73E-04 | 0.00948  |
| 4          | 0.02522                                     | 0.02419  | 0.0116   | 0.01227  |
| 6          | 0.03711                                     | 0.03772  | 0.02967  | 0.02799  |
| 8          | 0.04711                                     | 0.05836  | 0.0464   | 0.04327  |
| 10         | 0.06973                                     | 0.08161  | 0.06496  | 0.06863  |
| 15         | 0.118                                       | 0.13168  | 0.11192  | 0.11446  |
| 20         | 0.16989                                     | 0.17625  | 0.15276  | 0.14666  |
| 25         | 0.24281                                     | 0.21668  | 0.19058  | 0.17147  |
| 30         | 0.2918                                      | 0.2445   | 0.21933  | 0.18535  |
| 35         | 0.3113                                      | 0.26539  | 0.23754  | 0.18632  |
| 40         | 0.32478                                     | 0.28373  | 0.24007  | 0.18579  |
| 45         | 0.33515                                     | 0.29203  | 0.23972  |          |
| 50         | 0.33754                                     | 0.29169  | 0.23951  |          |
| 55         | 0.3371                                      |          |          |          |



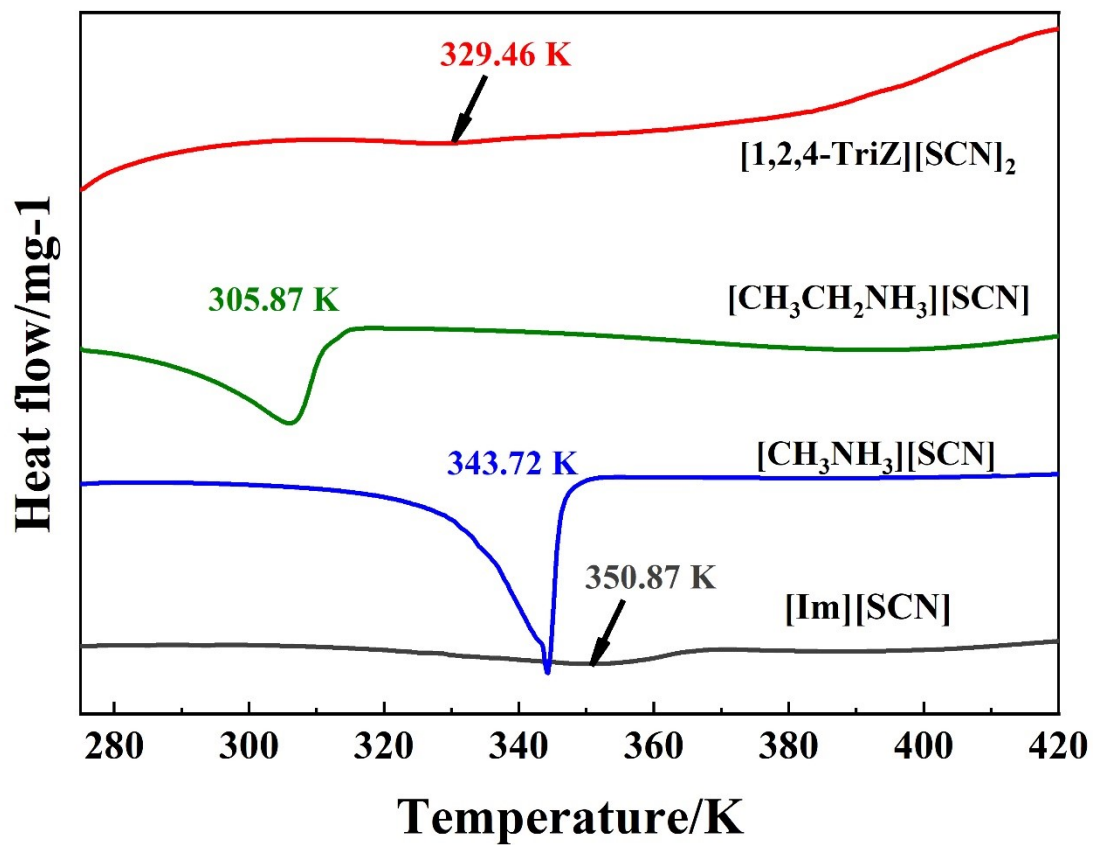

Fig. S1 Differential scanning calorimetry curves of PILs at 273 K-323 K.

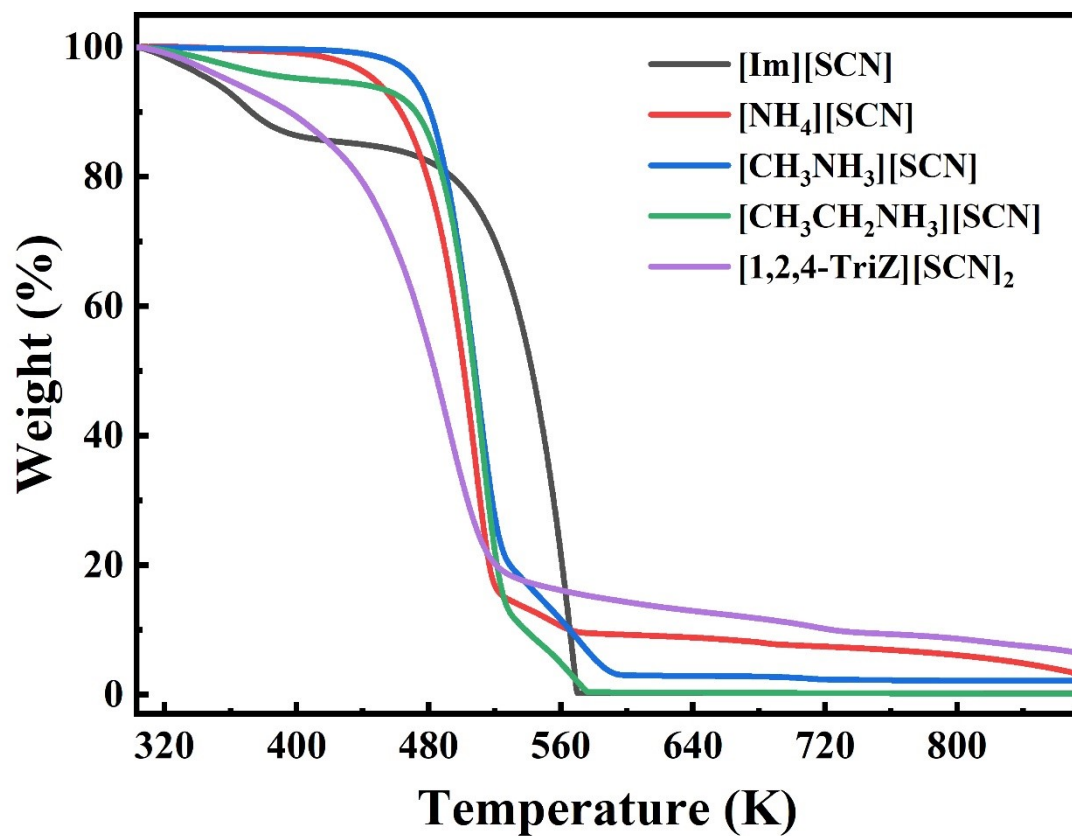

Fig. S2 Thermogravimetric analysis curves of PILs at 303.15 K-873.15 K.

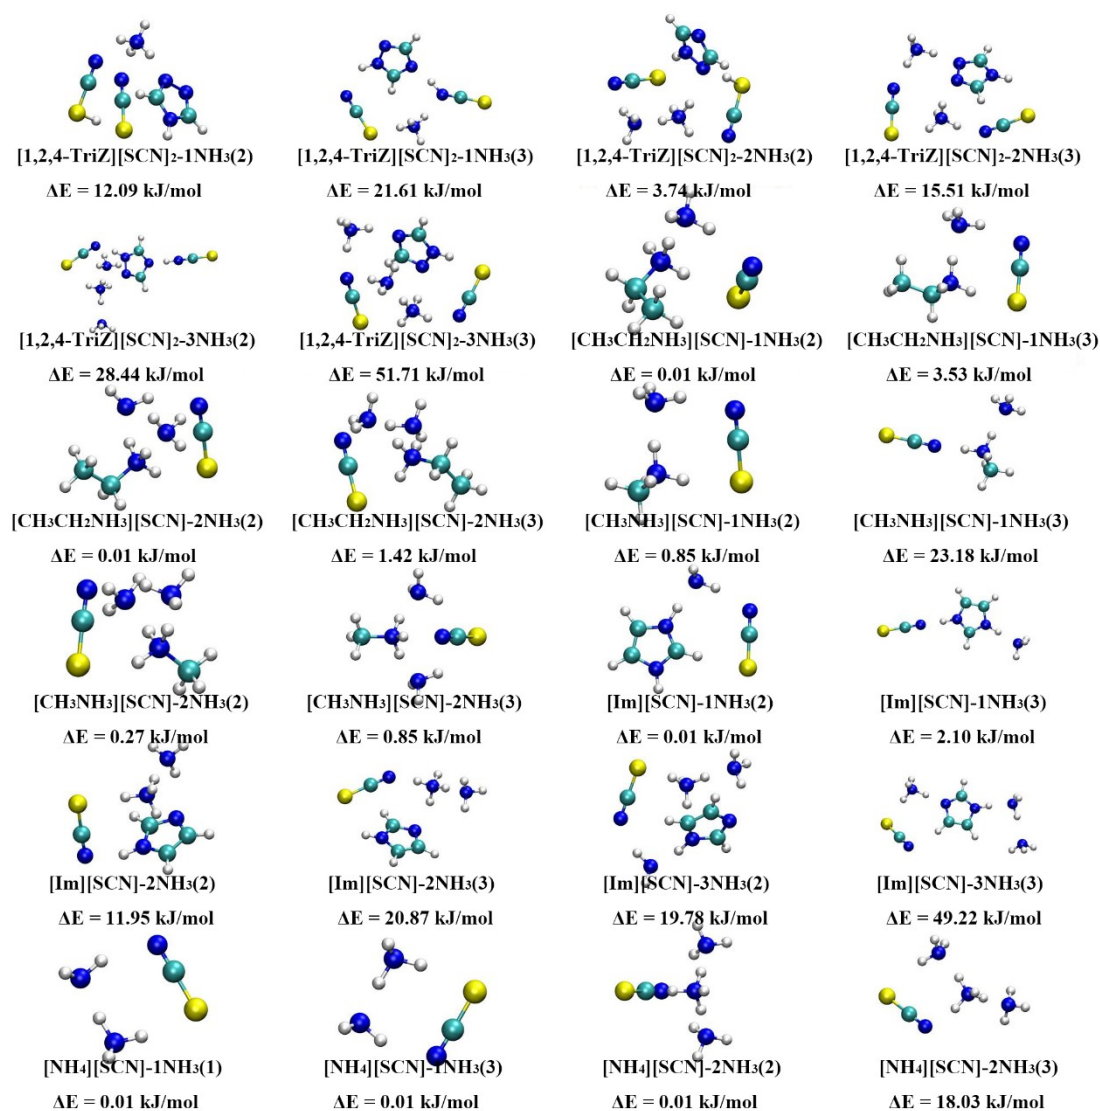

**Fig. S3** Optimized structures with lower energy and energy difference with the most stable structure, blue, N; yellow, S; white, H and azure, C.

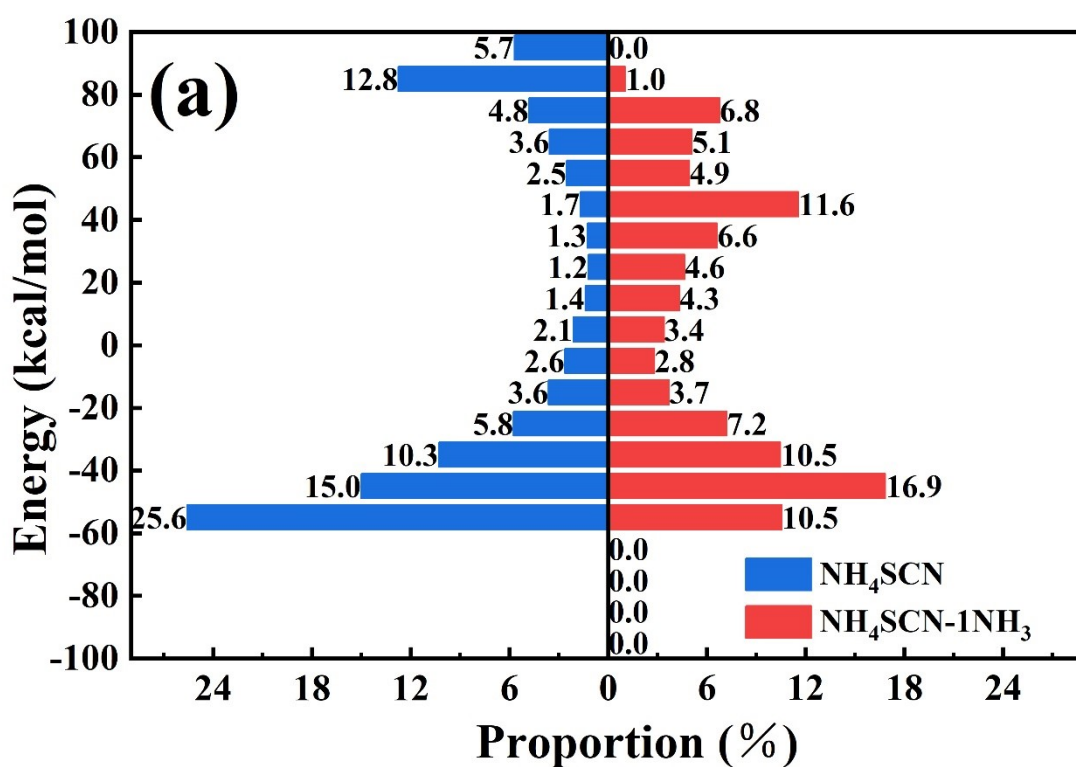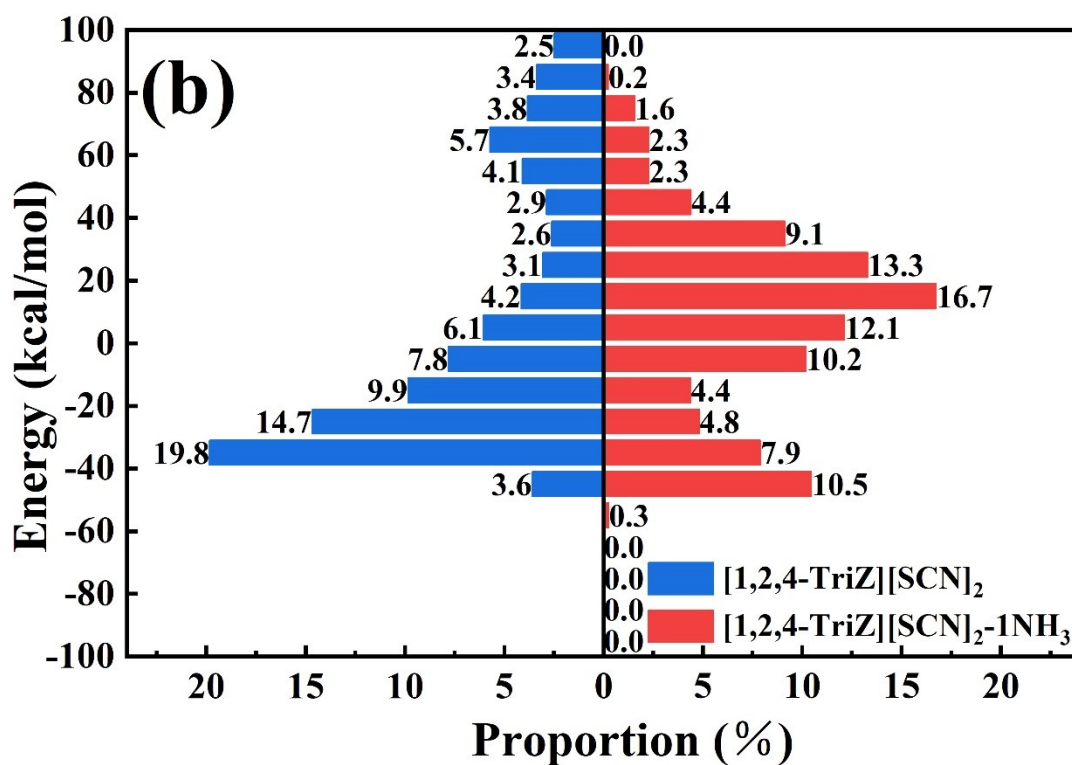

**Fig. S4** Proportion of surface electrostatic potential distribution for (a) NH<sub>4</sub>SCN and NH<sub>4</sub>SCN-1NH<sub>3</sub>; (b) [1,2,4-TriZ][SCN]<sub>2</sub> and [1,2,4-TriZ][SCN]<sub>2</sub>-1NH<sub>3</sub>.

### CMD Simulation of NH<sub>4</sub>SCN in Vacuum-Sealed Box

The diffusion of NH<sub>4</sub>SCN into NH<sub>3</sub> should be compared to the non-diffusion scenario of pure NH<sub>4</sub>SCN. A rectangular box measuring 36×36×72 nm<sup>3</sup> was constructed, containing 800 NH<sub>4</sub>SCN placed at the center along Z-axis (18 < Z < 54 nm), with vacuum layers at both ends. After energy minimization, this system was thermostatted to 298.15 K and subjected to 10 ns NVP simulation.

Fig. S5 shows the distribution of NH<sub>4</sub>SCN at several time points, indicating observable deformations at the surfaces of NH<sub>4</sub>SCN adjacent to vacuum layers as simulation progresses. However, the main body of the PIL layer remained complete. Even at 10 ns, no [NH<sub>4</sub>]<sup>+</sup> or [SCN]<sup>-</sup> ions were observed to diffuse from the PIL layer into the vacuum regions. The solvent accessible surface area (SASA) of NH<sub>4</sub>SCN within the box over time is shown in Fig. S6. Throughout 10 ns simulation, the SASA of NH<sub>4</sub>SCN slightly decreased from 35 nm<sup>2</sup> to 34.5 nm<sup>2</sup>, indicating no typical diffusion characteristic of surface fragmentation that would significantly increase the SASA. Both sets of data confirm that under the CMD simulation conditions, NH<sub>4</sub>SCN does not spontaneously diffuse.

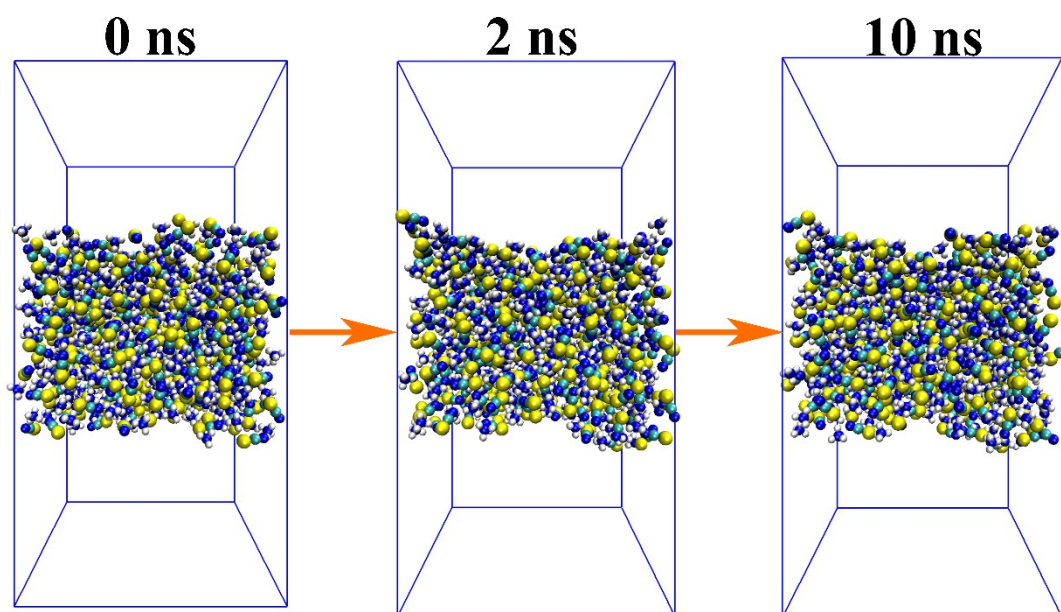

**Fig. S5** Diffusion process of NH<sub>4</sub>SCN in the vacuum-sealed box, blue, N; yellow, S; white, H and cyan, C.

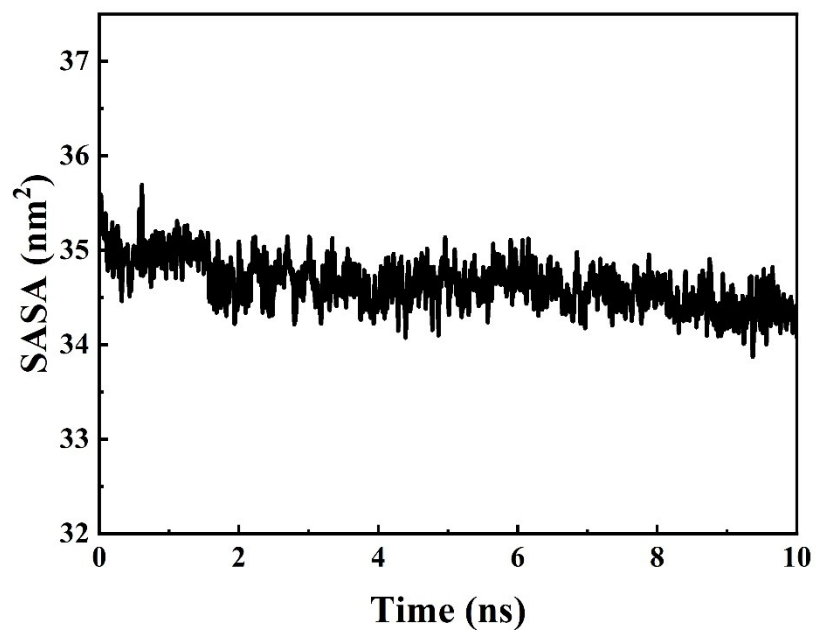

**Fig. S6** Solvent Accessible Surface Area of NH<sub>4</sub>SCN Over Time
